# Supplementary material for: The Association between Muscle Quantity and Overall Survival Depends on Muscle Radiodensity: A Cohort Study in Non-Small-Cell Lung Cancer Patients
Source: MDPI journal article supplement (doi:10.3390/jpm12071191), 2022-07-21
Supplement: s1 [file s1]

Supplementary Materials

# The Association between Muscle Quantity and Overall Survival Depends on Muscle Radiodensity: A Cohort Study in Non-Small-Cell Lung Cancer Patients

Appendix for: “The association between muscle quantity and overall survival depends on muscle radiodensity: a cohort study in non-small cell lung cancer patients”

## Sample size simulations

We used simulations to calculate the required sample size. Performing these simulations requires assumptions on three things: the outcome model (i.e. hazard ratios and baseline hazard function), the correlation between predictor variables and the censoring distribution.

As Sjöblom et al. (1) present the most complete multivariable analysis, we use their results (presented in their Table 3) as the basis for assumed parameter values. The assumed parameter values are presented in Table 1. The assumed parameter value for our target parameter SMISMD (the linear interaction between skeletal muscle index, SMI, and skeletal muscle radiodensity, SMD) was taken to be halfway between the hazard ratio for SMI and the hazard ratio for SMD on the log-hazard ratio scale. As the interpretation of the absolute value of a hazard ratio relies on the scale of the variable, the hazard ratio for the interaction term was rescaled by multiplying with the standard deviation of SMD and dividing by the standard deviation of SMISMD in each simulated dataset. The hazard ratios for histology subtypes were not given so we assumed values for these.

**Table S1.** Hazard ratios for sample size calculations. Adenocarcinoma is the reference category for histology group. BMI: body mass index, PS: ECOG performance score (0 is the reference category), SMD: skeletal muscle radiodensity, SMI: skeletal muscle index, SMISMD: interaction term between SMI and SMD.

| Term                | hazard_ratio | log_hazard_ratio |
|---------------------|--------------|------------------|
| Age                 | 0.99         | -0.010           |
| Male sex            | 0.77         | -0.261           |
| Histology: other    | 1.22         | 0.2              |
| Histology: squamous | 1.35         | 0.3              |
| BMI                 | 0.99         | -0.01            |
| PS 1                | 1.24         | 0.215            |
| PS $\geq 2$         | 1.89         | 0.636            |
| SMD                 | 0.98         | -0.017           |
| SMI                 | 0.99         | -0.010           |
| SMISMD              | 0.99         | -0.014           |

For all variables, marginal statistics (mean and standard deviations for continuous variables, frequency tables for discrete variables) were extracted from (1). As a frequency table for the four NSCLC stages was not available from (1), we used two additional

publications to reconstruct the frequency table for clinical stage. Dolan et al. provided the relative frequencies of stages I, II and III (2). Abbass et al. provided relative frequencies for stages III and IV (3). These relative frequencies were used to reconstruct a single full frequency table for all four stages. In addition to the hazard ratios for the individual parameters, the power also depends on the correlation between the predictor variables. As a complete covariance matrix for all variables was not available, we simulated covariate data using covariance structures induced by different Clayton copulas (4). Copulas are multivariate cumulative distribution functions whose marginal distributions are uniform on the unit interval. A Clayton copula can be defined using the known marginal statistics of the observed variables and a single unknown correlation parameter. This can be done by translating the marginal distributions (assumed to be Gaussian for continuous variables, binomial for binary variables and discretized Gaussian for discrete variables) of the variables to cumulative distribution functions. The inverse of these cumulative distribution functions are also uniform on the unit interval by definition and can then be identified with the marginal distributions from the copula. The relationship between the Clayton copula parameter and the average Pearson correlation coefficient of variables generated from such a copula is presented in Table 2.

**Table S2.** Clayton copula parameter versus average Pearson correlation coefficient of two variables simulated by a Clayton copula with that parameter value.

| <i>Copula parameter</i> | <i>Pearson correlation</i> |
|-------------------------|----------------------------|
| 0.1                     | 0.043                      |
| 0.2                     | 0.115                      |
| 0.3                     | 0.231                      |
| 0.4                     | 0.258                      |
| 0.5                     | 0.326                      |
| 0.6                     | 0.398                      |
| 0.7                     | 0.386                      |
| 0.8                     | 0.408                      |
| 0.9                     | 0.486                      |
| 1                       | 0.510                      |

Finally, the power also depends on the marginal survival distributions and the censoring distributions. We estimated the marginal survival distributions per stage, and the censoring distribution for all stages from our data. We used the parametric power generalized Weibull model (5) to estimate these survival distributions and to simulate survival times. To prevent extreme outliers with high leverage, simulated survival times over 15 years were censored. Kaplan-Meier estimates and power generalized Weibull estimates of the marginal survival distributions per stage are presented in Figure 1.

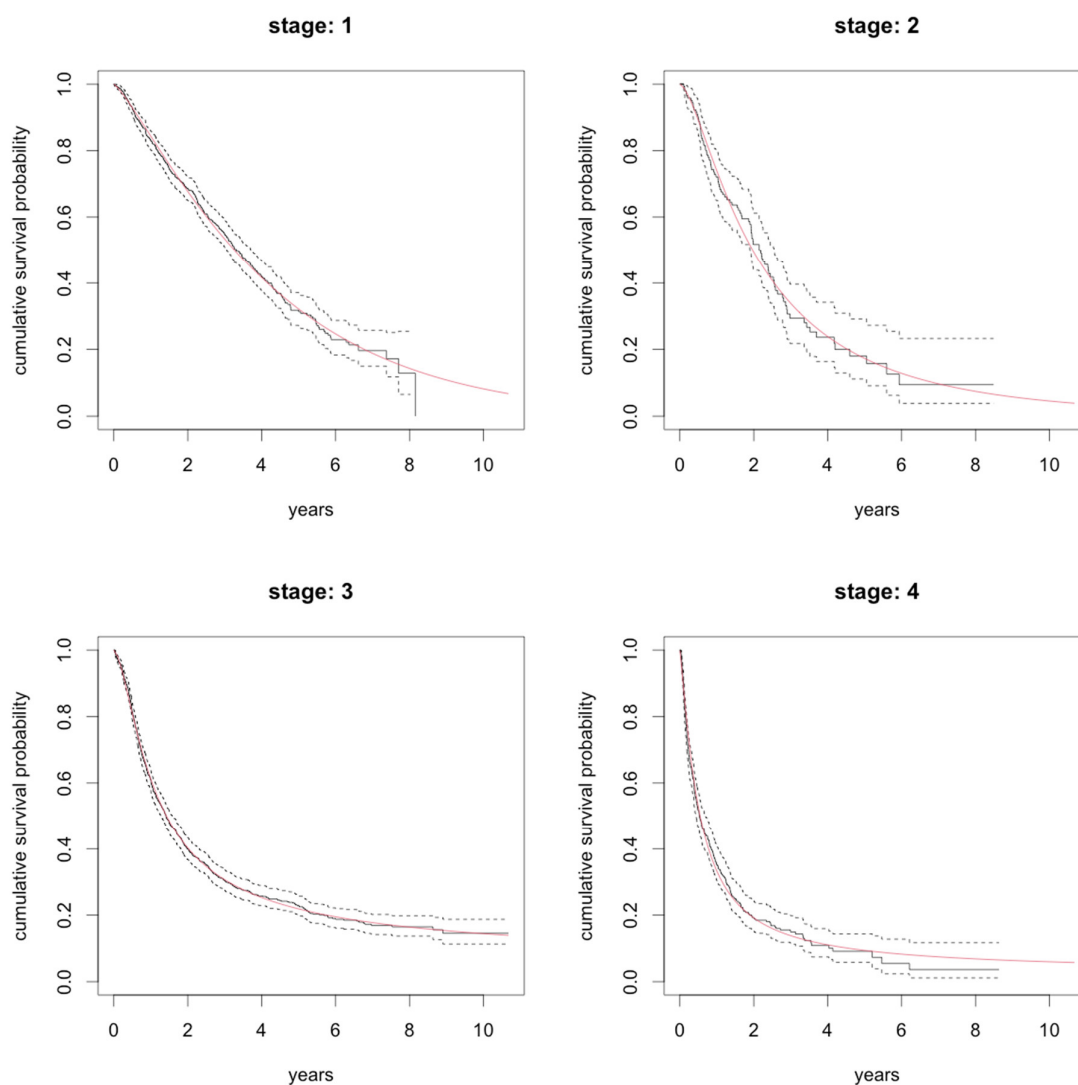

**Figure S1.** Marginal survival distributions per stage. The Kaplan-Meier estimate is presented with the solid black line, accompanied by a 95% confidence interval indicated with the dotted black line. The parametric power generalized Weibull estimate that was used in the simulations is indicated with the red line.

We calculated the power to detect the pre-specified interaction hazard ratio at a 0.05 significance level using a two-sided Student's T-test. We calculated the power over the following grid of values: Copula parameter 0.1, 0.25, 1.0; sample size 500, 1000, 2000. For each of the 9 combinations we simulated 1000 datasets. The power was defined as the number of times a significant result was detected divided by the total number of simulations for that setting. The results of the power analysis are presented in Table 3.

**Table S3.** Results of power analysis for the interaction term between skeletal muscle index (SMI) and skeletal muscle radiodensity (SMD).

| <i>Power</i> | <i>Sample size</i> | <i>Copula parameter</i> |
|--------------|--------------------|-------------------------|
| 0.576        | 500                | 0.1                     |
| 0.551        | 500                | 0.25                    |
| 0.517        | 500                | 1                       |
| 0.887        | 1000               | 0.1                     |
| 0.865        | 1000               | 0.25                    |
| 0.791        | 1000               | 1                       |
| 0.99         | 2000               | 0.1                     |
| 0.992        | 2000               | 0.25                    |
| 0.968        | 2000               | 1                       |

**Table S4.** Overview of different target regions for radiotherapy per stage.

| <b>target</b>                      | <b>missing</b> | <b>stage I</b> | <b>stage II</b> | <b>stage III</b> | <b>stage IV</b> |
|------------------------------------|----------------|----------------|-----------------|------------------|-----------------|
| missing                            | 0              | 0              | 0               | 0                | 1               |
| brain                              | 1              | 0              | 0               | 0                | 7               |
| hilus                              | 14             | 0              | 7               | 11               | 5               |
| hilus, supraclavicular             | 1              | 0              | 0               | 0                | 1               |
| lung                               | 456            | 667            | 92              | 179              | 126             |
| lung, hilus                        | 19             | 3              | 7               | 9                | 3               |
| lung, mediastinum                  | 158            | 26             | 28              | 571              | 121             |
| lung, mediastinum, hilus           | 3              | 0              | 0               | 16               | 1               |
| lung, mediastinum, supraclavicular | 5              | 0              | 0               | 8                | 2               |
| lung, supraclavicular              | 3              | 0              | 0               | 3                | 2               |
| lung, thoraxwall                   | 4              | 0              | 2               | 2                | 7               |
| lung, thoraxwall, vertebra         | 1              | 0              | 0               | 0                | 0               |
| lung, vertebra                     | 2              | 0              | 0               | 1                | 0               |
| mediastinum                        | 30             | 5              | 0               | 43               | 19              |
| mediastinum, hilus                 | 13             | 0              | 0               | 5                | 4               |
| mediastinum, hilus, thoraxwall     | 0              | 0              | 0               | 1                | 0               |
| mediastinum, hilus, vertebra       | 0              | 0              | 0               | 0                | 1               |
| mediastinum, supraclavicular       | 0              | 0              | 0               | 1                | 2               |
| mediastinum, vertebra              | 0              | 0              | 0               | 0                | 1               |
| other                              | 43             | 12             | 7               | 15               | 28              |
| plexus                             | 0              | 0              | 0               | 0                | 1               |
| supraclavicular                    | 2              | 0              | 0               | 0                | 1               |
| thoraxwall                         | 8              | 1              | 2               | 4                | 8               |
| thoraxwall, vertebra               | 1              | 0              | 0               | 1                | 1               |
| vertebra                           | 3              | 0              | 0               | 1                | 1               |

**Table of parameter estimates**

**Table S5.** Estimates of all parameters in the full model with linear interaction term and without stratification of the interaction. The estimates are provided on the log-hazard ratio scale. All continuous variables are scaled to unit variance. Higher order cubic spline terms of continuous variables are not scaled to unit variance which explains the otherwise extremely high parameter estimates. ECOG performance score 0 is the reference category for ecog\_bin1 and ecog\_bin2. Histology type adenocarcinoma is the reference category for the other histology types.

| term                            | estimate | std.error | statistic | df       | p.value |
|---------------------------------|----------|-----------|-----------|----------|---------|
| age                             | -0.018   | 0.122     | -0.144    | 1329.330 | 0.886   |
| sex_maleTRUE                    | 0.188    | 0.097     | 1.929     | 713.392  | 0.054   |
| histono_pa                      | 0.002    | 0.127     | 0.015     | 316.727  | 0.988   |
| histoother                      | 0.194    | 0.106     | 1.831     | 1525.555 | 0.067   |
| histosquamous                   | 0.208    | 0.089     | 2.336     | 1524.444 | 0.020   |
| ecog_bin1                       | 0.099    | 0.115     | 0.857     | 338.536  | 0.392   |
| ecog_bin2                       | 0.511    | 0.113     | 4.515     | 381.416  | 0.000   |
| bmi                             | 0.043    | 0.216     | 0.198     | 325.775  | 0.843   |
| smi                             | -0.243   | 0.184     | -1.315    | 345.824  | 0.189   |
| smd                             | 0.053    | 0.197     | 0.268     | 501.070  | 0.789   |
| age1                            | 0.183    | 0.535     | 0.342     | 1339.720 | 0.733   |
| age2                            | 0.828    | 3.376     | 0.245     | 1349.396 | 0.806   |
| bmi1                            | -1.802   | 1.685     | -1.069    | 439.175  | 0.286   |
| bmi2                            | 12.337   | 8.705     | 1.417     | 485.333  | 0.157   |
| smi1                            | 1.127    | 1.323     | 0.852     | 405.681  | 0.395   |
| smi2                            | -2.792   | 6.181     | -0.452    | 413.667  | 0.652   |
| smd1                            | -0.712   | 0.713     | -0.998    | 509.379  | 0.319   |
| smd2                            | 5.390    | 5.772     | 0.934     | 537.145  | 0.351   |
| age3                            | -3.845   | 7.203     | -0.534    | 1345.819 | 0.594   |
| bmi3                            | -18.958  | 11.953    | -1.586    | 514.767  | 0.113   |
| smi3                            | 0.486    | 8.643     | 0.056     | 409.716  | 0.955   |
| smd3                            | -7.733   | 11.220    | -0.689    | 554.587  | 0.491   |
| smismd                          | -0.089   | 0.031     | -2.868    | 391.247  | 0.004   |
| age:c_stage_earlyTRUE           | -0.160   | 0.288     | -0.556    | 463.172  | 0.579   |
| sex_maleTRUE:c_stage_earlyTRUE  | 0.031    | 0.142     | 0.218     | 709.628  | 0.828   |
| histono_pa:c_stage_earlyTRUE    | 0.006    | 0.200     | 0.033     | 538.576  | 0.974   |
| histoother:c_stage_earlyTRUE    | -0.008   | 0.242     | -0.032    | 1228.706 | 0.974   |
| histosquamous:c_stage_earlyTRUE | 0.184    | 0.196     | 0.939     | 1240.738 | 0.348   |
| ecog_bin1:c_stage_earlyTRUE     | -0.506   | 0.190     | -2.659    | 281.168  | 0.008   |
| ecog_bin2:c_stage_earlyTRUE     | -0.417   | 0.185     | -2.257    | 326.862  | 0.025   |
| bmi:c_stage_earlyTRUE           | -0.089   | 0.337     | -0.264    | 244.152  | 0.792   |
| smi:c_stage_earlyTRUE           | -0.017   | 0.292     | -0.059    | 267.759  | 0.953   |
| smd:c_stage_earlyTRUE           | -0.171   | 0.222     | -0.770    | 611.886  | 0.441   |
| age1:c_stage_earlyTRUE          | 0.498    | 1.004     | 0.496     | 762.491  | 0.620   |
| age2:c_stage_earlyTRUE          | -3.642   | 5.699     | -0.639    | 902.736  | 0.523   |
| bmi1:c_stage_earlyTRUE          | -0.798   | 2.690     | -0.297    | 335.899  | 0.767   |
| bmi2:c_stage_earlyTRUE          | 3.673    | 14.236    | 0.258     | 361.337  | 0.797   |
| smi1:c_stage_earlyTRUE          | 1.101    | 2.166     | 0.508     | 299.204  | 0.612   |
| smi2:c_stage_earlyTRUE          | -6.375   | 10.000    | -0.638    | 320.489  | 0.524   |
| smd1:c_stage_earlyTRUE          | 0.162    | 0.949     | 0.171     | 480.186  | 0.865   |
| smd2:c_stage_earlyTRUE          | 2.547    | 8.788     | 0.290     | 422.612  | 0.772   |

|                               |        |        |        |          |       |
|-------------------------------|--------|--------|--------|----------|-------|
| <b>age3:c_stage_earlyTRUE</b> | 7.489  | 11.143 | 0.672  | 1000.686 | 0.502 |
| <b>bmi3:c_stage_earlyTRUE</b> | -3.758 | 19.964 | -0.188 | 372.093  | 0.851 |
| <b>smi3:c_stage_earlyTRUE</b> | 9.752  | 13.834 | 0.705  | 333.289  | 0.481 |
| <b>smd3:c_stage_earlyTRUE</b> | -9.027 | 18.269 | -0.494 | 406.953  | 0.621 |

## References

1. Sjøblom B, Grønberg BH, Wentzel-Larsen T, Baracos VE, Hjerstad MJ, Aass N, et al. Skeletal muscle radiodensity is prognostic for survival in patients with advanced non-small cell lung cancer. *Clinical Nutrition*. 2016;35(6):1386–93.
2. Dolan RD, Maclay JD, Abbass T, Colville D, Buali F, MacLeod N, et al. The relationship between 18F-FDG-PETCT-derived tumour metabolic activity, nutritional risk, body composition, systemic inflammation and survival in patients with lung cancer. *Scientific Reports* [Internet]. 2020;10(1). Available from: <https://www.scopus.com/inward/record.uri?eid=2-s2.0-85096909045&doi=10.1038%2fs41598-020-77269-7&partnerID=40&md5=dedc04a0cc3d872c6f11ab44a6e4bb0d>
3. Abbass T, Dolan RD, MacLeod N, Horgan PG, Laird BJ, McMillan DC. Comparison of the prognostic value of MUST, ECOG-PS, mGPS and CT derived body composition analysis in patients with advanced lung cancer. *Clinical Nutrition ESPEN*. 2020;40:349–56.
4. Yan J. Enjoy the Joy of Copulas: With a Package copula. *Journal of Statistical Software*. 2007 Oct 8;21(1):1–21.
5. Burke K, Jones MC, Noufaily A. A Flexible Parametric Modelling Framework for Survival Analysis. *Journal of the Royal Statistical Society: Series C (Applied Statistics)*. 2020 Apr;69(2):429–57.
